# Supplementary material
Source: PubMed Central journal article supplement (PMC9343652)
Supplement: 41401_2021_812_MOESM1_ESM.pdf [file 41401_2021_812_MOESM1_ESM.pdf]

**Supplementary Information**

**Transcriptional Regulator CTR9 Promotes Hepatocellular Carcinoma Progression  
and Metastasis via Increasing PEG10 Transcriptional Activity**

Bin Zhang, Zhi-yi Liu, Rui Wu, Cheng-ming Zhang, Kuan Cao, Wen-gang Shan, Zhen  
Liu, Ming Ji, Zi-lu Tian, Gautam Sethi, Heng-liang Shi, Ren-hao Wang

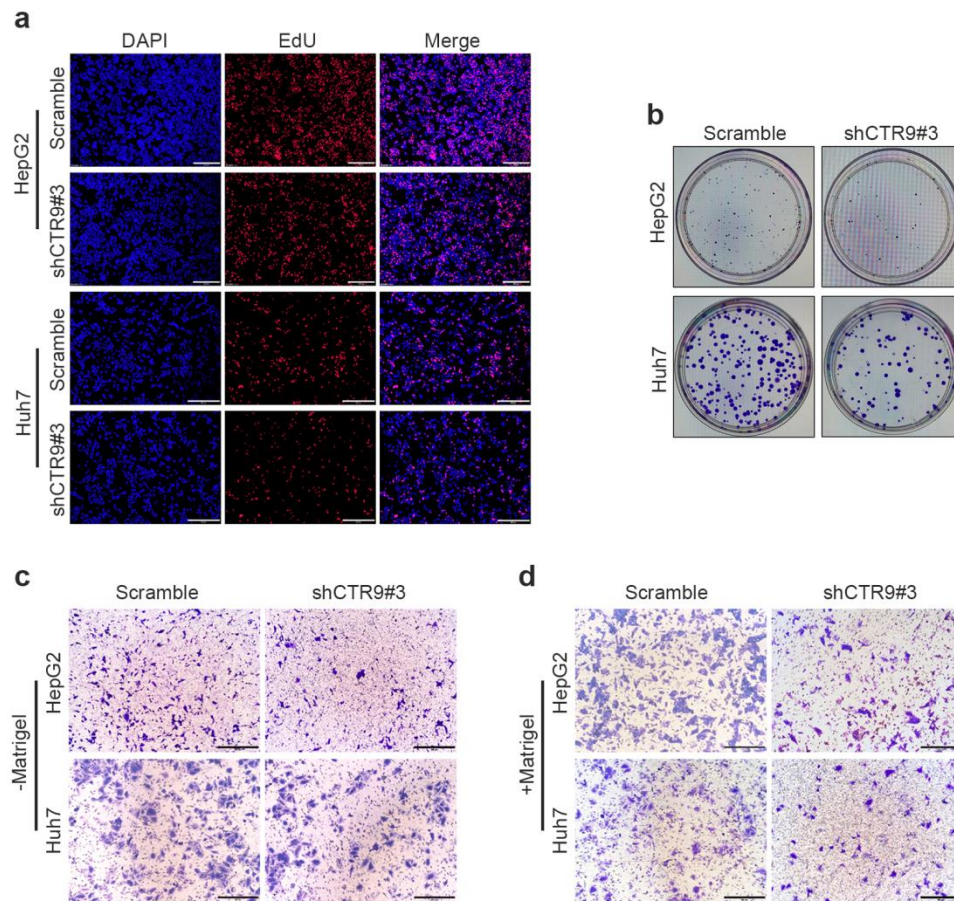

**Fig S1. Cln Three Requiring 9 (CTR9) knockdown suppresses hepatocellular carcinoma (HCC) cell proliferation, invasion, and migration.** **a** Representative images from the EdU-incorporation assay in HepG2 and Huh7 cells after CTR9 knockdown. **b** Representative images from the colony formation assay in *CTR9*-silenced HepG2 and Huh7 cells. **c** Representative images from the Transwell migration assay in *CTR9*-silenced HepG2 and Huh7 cells. **d** Representative images from the Transwell invasion assay in *CTR9*-silenced HepG2 and Huh7 cells.

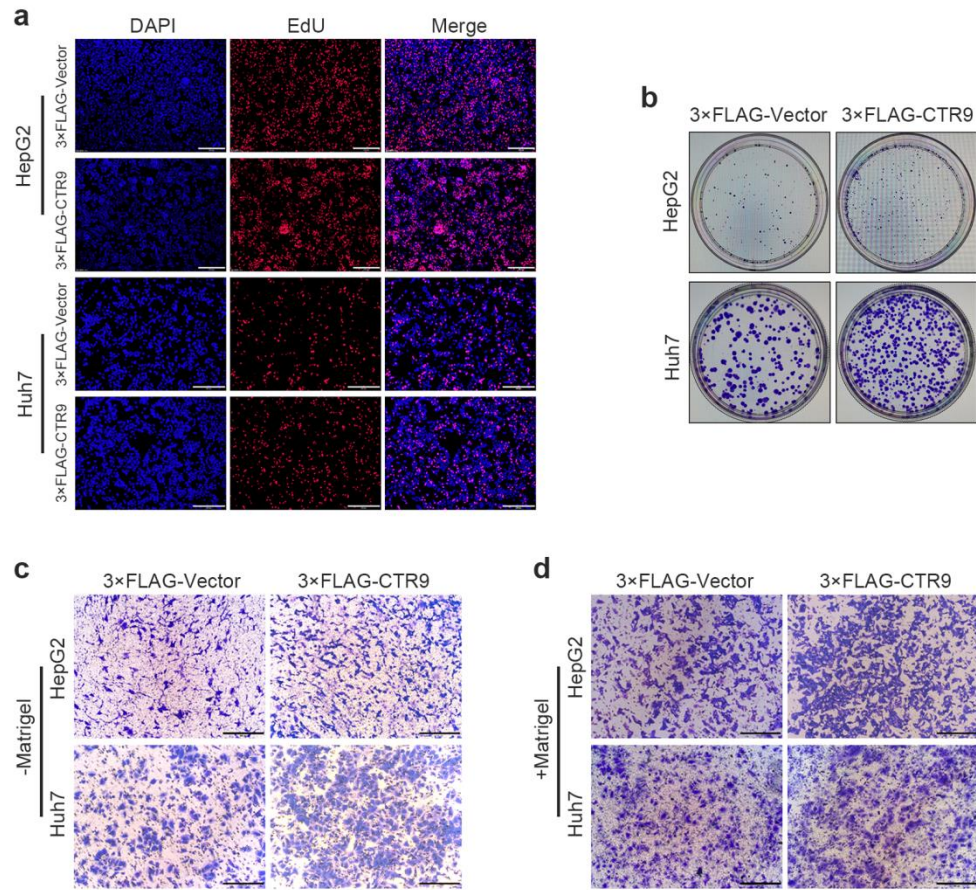

**Fig S2. CTR9 overexpression enhances HCC cell proliferation, invasion, and migration.** **a** Representative images from the EdU-incorporation assay in HepG2 and Huh7 cells after CTR9 overexpression. **b** Representative images from the colony formation assay in *CTR9*-overexpressing HepG2 and Huh7 cells. **c** Representative images from the Transwell migration assay in *CTR9*-overexpressing HepG2 and Huh7 cells. **d** Representative images from the Transwell invasion assay in *CTR9*-overexpressing HepG2 and Huh7 cells.



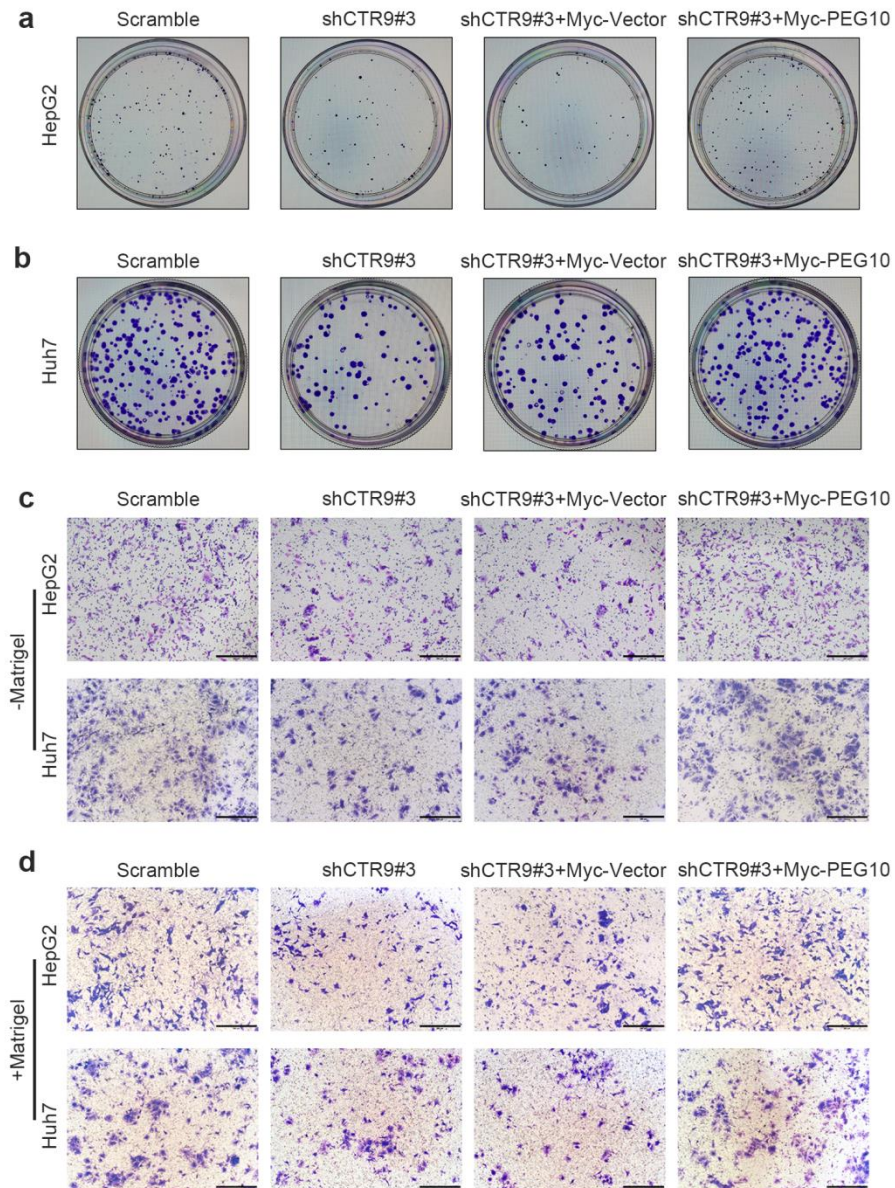

**Fig S3. CTR9 positively regulates *paternally expressed gene 10 (PEG10)* transcription in HCC cells. a, b** Representative images from the colony formation assay showing that *PEG10* overexpression effectively reverses the effects of CTR9 knockdown on HepG2 and Huh7 cell proliferation. **c, d** Representative images from Transwell migration and invasion assays showing that *PEG10* overexpression effectively reverses the effect of CTR9 knockdown on HepG2 and Huh7 cell migration and invasion.
